# Supplementary material for: c-Jun-N-terminal phosphorylation regulates DNMT1 expression and genome wide methylation in gliomas
Source: PubMed Central journal article supplement (PMC5351681; doi:10.18632/oncotarget.14330), 2016-12-28
Supplement: oncotarget-08-6940-s001.pdf [file oncotarget-08-6940-s001.pdf]

# c-Jun-N-terminal phosphorylation regulates DNMT1 expression and genome wide methylation in gliomas

## SUPPLEMENTARY FIGURES AND TABLE

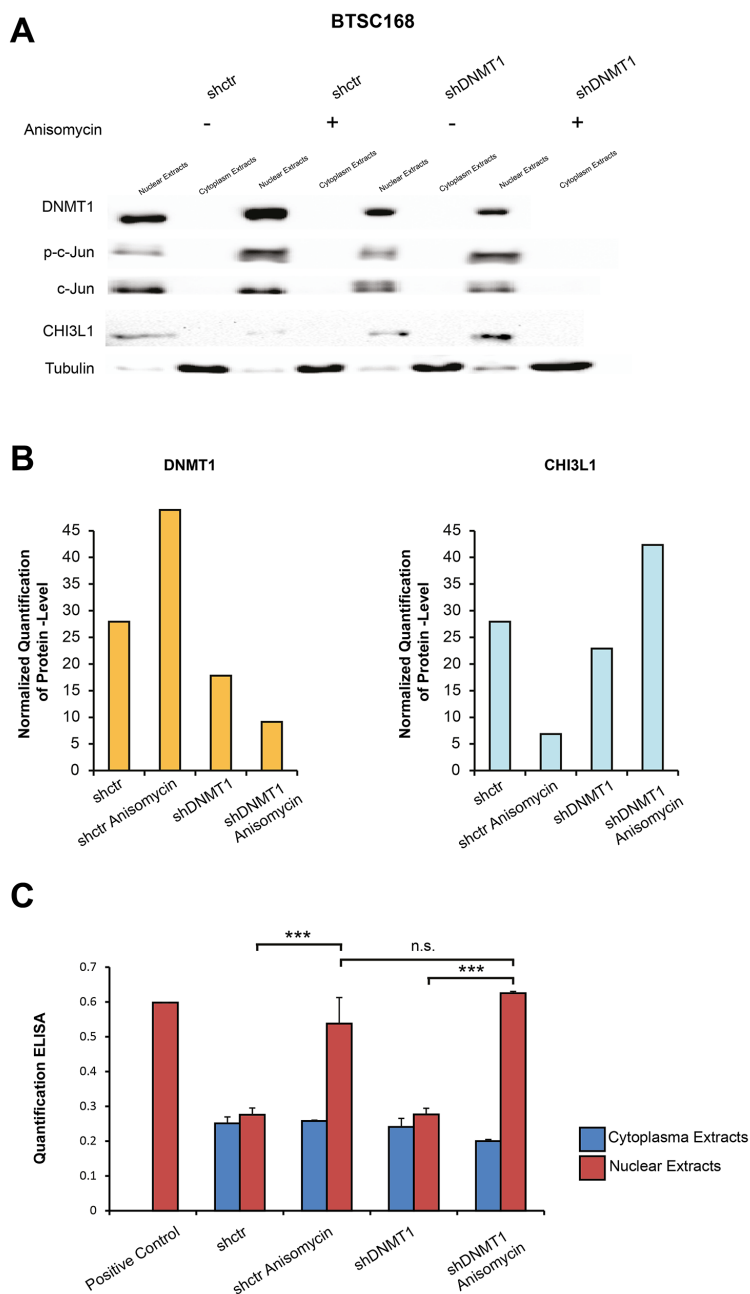

**Supplementary Figure 1: NF- $\kappa$ B activation by p-Jun does not require DNMT1.** A-B. Immunoblotting analysis of BTSC168 transduced with shctr or shDNMT1 lentivirus, and treated with Anisomycin. The quantification of DNMT1 and CHI3L1 was normalized based on the tubulin protein-level (B). C. Analysis of NF- $\kappa$ B nuclear binding to a  $\kappa$ B-responsive sequence, in nuclear and cytoplasm extracts. Significance level was defined as \* $p < 0.05$ , \*\*\* $p < 0.005$ . Error bars represent mean  $\pm$  standard error of the mean (SEM) of at least three independent experiments.

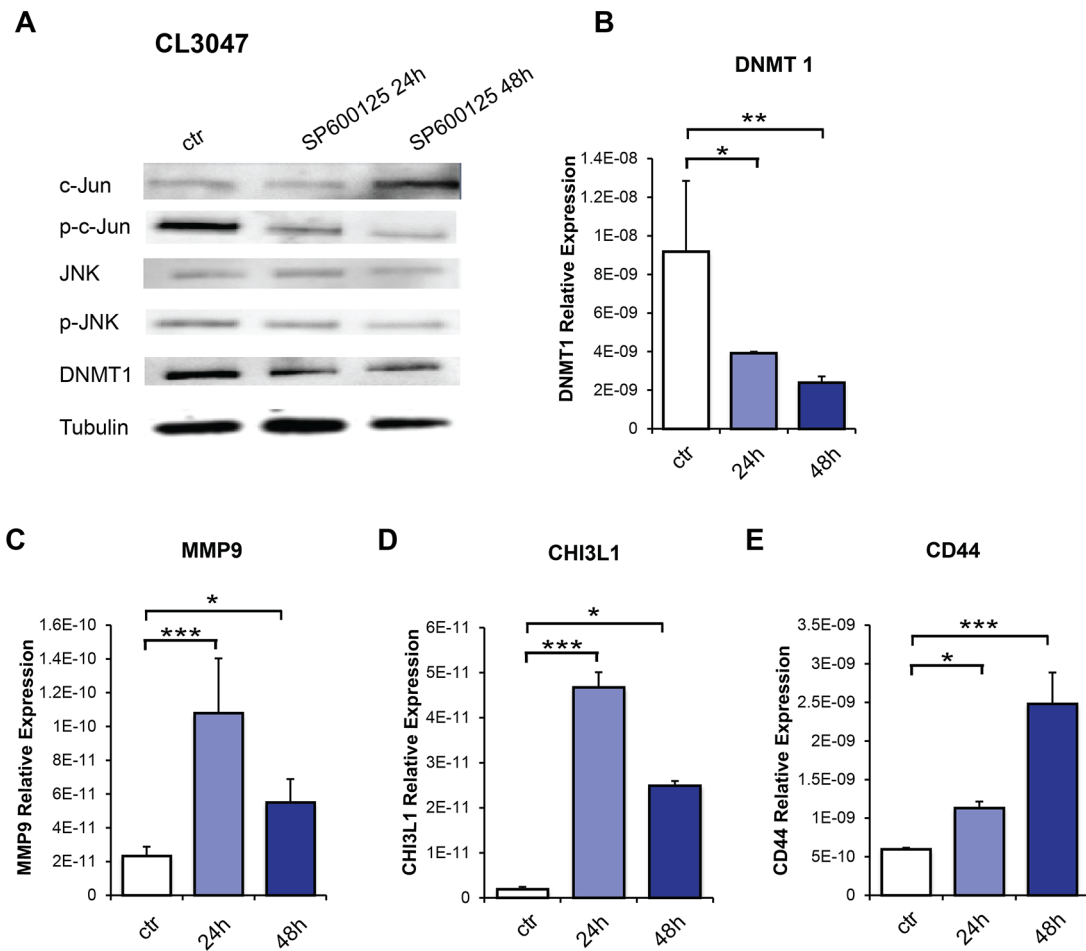

**Supplementary Figure 2: Characterization of CL3047 cells.** **A.** Immunoblot analysis of c-Jun, p-c-Jun, JNK, p-JNK and DNMT1 expression in the primary proneural cell line CL3047. **B.** q-RT PCR showing DNMT1 expression in CL3047 upon treatment with JNK inhibitor SP600125. **C-D.** q-RT PCR showing expression of the three mesenchymal genes (MMP9, CHI3L1 and CD44) in CL3021, upon treatment with JNK inhibitor SP600125.

Supplementary Table 1: Table of Freiburg glioma patients

| Patient | DNMT1      | Grade | Tumor | PFS  | OS     | Age  |
|---------|------------|-------|-------|------|--------|------|
| BT178   | 0.10223082 | IV    | GBM   | 2.9  | 118.3  | 75.5 |
| BT66    | 0.10298547 | IV    | GBM   | 12.9 | 423.2  | 72.5 |
| BT175   | 0.12928351 | IV    | GBM   | 1.9  | 153.4  | 73.7 |
| BT163   | 0.1757574  | IV    | GBM   | 4.2  | 330.9  | 63.7 |
| BT25    | 0.18325079 | IV    | GBM   | 5.6  | 202.6  | 72.4 |
| BT146   | 0.28164113 | IV    | GBM   | 0.5  | 47.1   | 69.2 |
| BT143   | 0.32415333 | IV    | GBM   | 6.6  | 231.6  | 73.1 |
| BT12    | 0.33350049 | IV    | GBM   | 7.9  | 271.7  | 68.2 |
| BT10    | 0.45983831 | IV    | GBM   | 9.4  | 316.9  | 73.8 |
| BT205   | 0.48212423 | IV    | GBM   | 1.2  | 68.2   | 63.5 |
| BT48    | 0.50130003 | IV    | GBM   | 0.7  | 52.1   | 79.3 |
| BT5     | 0.50496325 | IV    | GBM   | 3.3  | 136.4  | 63.2 |
| BT197   | 0.58272251 | IV    | GBM   | 5.9  | 210.6  | 63.9 |
| BT108   | 0.9124834  | IV    | GBM   | 11.8 | 390.1  | 70.9 |
| BT206   | 0.99113128 | IV    | GBM   | 3.0  | 687.9  | 54.2 |
| BT101   | 1.14044974 | II    | O     | 93.9 | 6835.7 | 24.0 |
| BT280   | 1.4295224  | II    | OA    | 68.0 | 1187.2 | 22.7 |
| BT187   | 1.54053316 | II    | A     | 81.3 | 2925.0 | 38.7 |
| BT69    | 1.81343056 | III   | AOA   | 3.5  | 137.4  | 76.0 |
| BT32    | 1.84820793 | III   | AOA   | 9.7  | 6835.7 | 33.7 |
| BT18    | 1.86937354 | III   | AOA   | 17.4 | 1187.2 | 23.2 |
| BT55    | 2.37788373 | III   | AOA   | 4.3  | 351.0  | 59.0 |
| BT126   | 2.55342919 | IV    | GBM   | 10.9 | 362.0  | 77.5 |
| BT155   | 3.32685118 | III   | AOA   | 27.6 | 2101.7 | 22.0 |
| BT131   | 3.32812272 | III   | AOA   | 53.3 | 2925.0 | 30.8 |
| BT141   | 4.45244737 | II    | O     | 85.8 | 3643.0 | 37.4 |
| BT22    | 5.50056448 | III   | AOA   | 16.8 | 843.3  | 56.4 |
| BT55    | 7.22385196 | III   | AOA   | 4.3  | 351.0  | 59.0 |
| BT116   | 7.58670253 | III   | AOA   | 3.9  | 150.4  | 75.6 |
| BT136   | 7.6550655  | IV    | GBM   | 1.4  | 72.2   | 62.5 |
| BT77    | 10.2550999 | III   | AOA   | 58.4 | 2020.5 | 36.5 |
| BT34    | 12.0645712 | III   | AOA   | 68.9 | 2685.3 | 56.1 |

Table containing Freiburg patients information including DNMT1 expression data by qRT-PCR (S18-normalized), overall survival (OS in days), progression-free survival (PFS in days) and age in years.
